# Supplementary material for: Follicular Fluid Proteomic Analysis of Women Undergoing Assisted Reproduction Suggests That Apolipoprotein A1 Is a Potential Fertility Marker
Source: MDPI journal article supplement (doi:10.3390/ijms25010486), 2023-12-29
Supplement: s1 [file s1]

Supplementary Table S1. Abbreviations of the follicular fluid proteins in the PPI analyses.

| <b>Abbreviation</b> | <b>Name of the protein</b>                                           |
|---------------------|----------------------------------------------------------------------|
| A1BG                | Alpha-1B-glycoprotein                                                |
| A2M                 | Alpha-2-macroglobulin                                                |
| AFM                 | Afamin                                                               |
| AGT                 | Angiotensin                                                          |
| AHSG                | Alpha-2-HS-glycoprotein chain A                                      |
| ALB                 | Serum albumin                                                        |
| AMBP                | Inter-alpha-trypsin inhibitor                                        |
| APOA1               | Apolipoprotein A-I                                                   |
| APOA2               | Apolipoprotein A-II                                                  |
| APOA4               | Apolipoprotein A-IV                                                  |
| APOC3               | Apolipoprotein C-III                                                 |
| APOH                | Beta-2-glycoprotein 1                                                |
| APOL1               | Apolipoprotein L1                                                    |
| C3                  | Complement C3c alpha chain fragment 1                                |
| C4B                 | Complement C4-B alpha chain                                          |
| C5                  | Complement C5 alpha chain                                            |
| C8B                 | Complement component C8 beta chain                                   |
| C9                  | Complement component C9a                                             |
| CFB                 | Complement factor B Ba fragment                                      |
| CFH                 | Complement factor H                                                  |
| CLU                 | Clusterin alpha chain                                                |
| CP                  | Ceruloplasmin                                                        |
| CPN2                | Carboxypeptidase N subunit 2                                         |
| F2                  | Activation peptide fragment 1                                        |
| FGA                 | Fibrinogen alpha chain                                               |
| FGB                 | Fibrinogen beta chain                                                |
| FGG                 | Fibrinogen gamma chain                                               |
| FN1                 | Fibronectin                                                          |
| GC                  | Vitamin D-binding protein                                            |
| GSN                 | Gelsolin                                                             |
| HBA1                | Hemoglobin subunit alpha 1                                           |
| HBB                 | Hemoglobin subunit beta                                              |
| HP                  | Haptoglobin alpha chain                                              |
| HPX                 | Hemopexin                                                            |
| HRG                 | Histidine-rich glycoprotein                                          |
| HSPG2               | Basement membrane-specific heparan sulfate proteoglycan core protein |
| IGHV3OR16-9         | Immunoglobulin heavy variable 3/OR16-9                               |
| IGKV2D-28           | Immunoglobulin kappa variable 2-28                                   |
| ITIH1               | Inter-alpha-trypsin inhibitor heavy chain H1                         |
| ITIH2               | Inter-alpha-trypsin inhibitor heavy chain H2                         |
| ITIH4               | 35 kDa inter-alpha-trypsin inhibitor heavy chain H4                  |
| KNG1                | Low molecular weight growth-promoting factor                         |
| LBP                 | Lipopolysaccharide-binding protein                                   |
| LRG1                | Leucine rich alpha-2-glycoprotein 1                                  |
| ORM1                | Alpha-1-acid glycoprotein 1                                          |
| PGLYRP2             | N-acetylmuramoyl-L-alanine amidase                                   |
| PLG                 | Plasmin heavy chain A, short form                                    |

|          |                                                                        |
|----------|------------------------------------------------------------------------|
| PON1     | Serum paraoxonase/arylesterase 1                                       |
| SERPINA1 | Short peptide from AAT                                                 |
| SERPINA3 | Alpha-1-antichymotrypsin His-Pro-less                                  |
| SERPINA6 | Corticosteroid-binding globulin                                        |
| SERPINA7 | Thyroxine-binding globulin                                             |
| SERPINC1 | Antithrombin-III                                                       |
| SERPIND1 | Heparin cofactor 2                                                     |
| SERPINF1 | Pigment epithelium-derived factor                                      |
| SERPINF2 | Alpha-2-antiplasmin                                                    |
| SERPING1 | Plasma protease C1 inhibitor                                           |
| SHBG     | Sex hormone-binding globulin                                           |
| TF       | Serotransferrin                                                        |
| TTR      | Transthyretin                                                          |
| VTN      | Vitronectin V10 subunit                                                |
| WHAMM    | WASP homolog-associated protein with actin, membranes and microtubules |
